# Supplementary material
Source: PubMed Central journal article supplement (PMC6019162)
Supplement: NIHMS949250-supplement-2.pdf [file NIHMS949250-supplement-2.pdf]

**Table S1: Characteristics of patients who refused participation**

|                       |             |
|-----------------------|-------------|
| n                     | 105         |
| Median age in y (IQR) | 15 (13, 17) |
| Male (%)              | 63 (60)     |
| Race                  |             |
| White (%)             | 77 (73.3)   |
| Black (%)             | 7 (6.7)     |
| Asian (%)             | 20 (19.0)   |
| Other (%)             | 2 (1.9)     |
| Hispanic (%)          | 6 (5.7)     |
| U.S. Study site (%)   | 72 (68.6)   |

A slightly greater proportion of refusals than participants were White and Asian.
