# Supplementary material
Source: PubMed Central journal article supplement (PMC6019162)
Supplement: NIHMS949250-supplement-3.pdf [file NIHMS949250-supplement-3.pdf]

**Table S2: Characteristics of participants not using the pillbox in the intervention interval**

|                                                | <b>Control<br/>(n =14)</b> | <b>Intervention<br/>(n = 17)</b> |
|------------------------------------------------|----------------------------|----------------------------------|
| <b>Demographics</b>                            |                            |                                  |
| Median age in y (IQR)                          | 17.4 (12.9 – 18.6)         | 15.5 (12.5 – 17.1)               |
| Male (%)                                       | 9 (64.3)                   | 7 (41.2)                         |
| Race                                           |                            |                                  |
| White (%)                                      | 12 (85.7)                  | 13 (76.5)                        |
| Black (%)                                      | 1 (7.1)                    | 2 (11.8)                         |
| Asian (%)                                      | 0 (0.0)                    | 0 (0.0)                          |
| Other (%)                                      | 1 (7.1)                    | 2 (11.8)                         |
| Hispanic (%)                                   | 1 (7.1)                    | 1 (5.9)                          |
| U.S. Study site (%)                            | 10 (71.4)                  | 14 (82.4)                        |
| Healthcare Insurer                             |                            |                                  |
| U.S. Public                                    | 3 (21.4)                   | 7 (41.2)                         |
| Private                                        | 7 (50.0)                   | 7 (41.2)                         |
| Canadian provincial                            | 4 (28.6)                   | 3 (17.7)                         |
| Medication Insurer                             |                            |                                  |
| U.S. Public                                    | 3 (21.4)                   | 6 (35.3)                         |
| Private                                        | 10 (71.4)                  | 11 (64.7)                        |
| Canadian provincial                            | 1 (7.1)                    | 0 (0.0)                          |
| Primary caregiver                              |                            |                                  |
| Mother                                         | 11 (78.6)                  | 10 (58.8)                        |
| Father                                         | 2 (14.3)                   | 4 (23.5)                         |
| Grandparent                                    | 0 (0.0)                    | 1 (5.9)                          |
| Self                                           | 1 (7.1)                    | 2 (11.8)                         |
| Education of primary caregiver                 |                            |                                  |
| Less than high school                          | 0 (0.0)                    | 1 (5.9)                          |
| High school                                    | 4 (28.6)                   | 4 (23.5)                         |
| Some college                                   | 5 (35.7)                   | 6 (35.3)                         |
| Completed Business/Trade/Technical School      | 2 (14.3)                   | 2 (11.8)                         |
| College graduate                               | 3 (21.4)                   | 3 (17.7)                         |
| Completed Graduate School                      | 0 (0.0)                    | 1 (5.9)                          |
| Adults in household (number, not including pt) |                            |                                  |
| 0                                              | 3 (21.4)                   | 1 (5.9)                          |
| 1                                              | 2 (14.3)                   | 3 (17.7)                         |
| 2                                              | 4 (28.6)                   | 9 (52.9)                         |
| ≥3                                             | 5 (35.7)                   | 4 (23.5)                         |
| Household income                               |                            |                                  |
| Less Than \$25,000                             | 1 (7.1)                    | 3 (17.7)                         |
| \$25,000 - \$50,000                            | 3 (21.4)                   | 4 (23.5)                         |
| \$51,000 - \$75,000                            | 5 (35.7)                   | 6 (35.3)                         |
| \$76,000 - \$100,000                           | 2 (14.3)                   | 0 (0.0)                          |
| Greater Than \$100,000                         | 0 (0.0)                    | 2 (11.8)                         |
| Prefer Not to Answer                           | 0 (0.0)                    | 0 (0.0)                          |
| Unknown                                        | 3 (21.4)                   | 2 (11.8)                         |
| <b>Disease characteristics</b>                 |                            |                                  |

|                                                                             |                    |                    |
|-----------------------------------------------------------------------------|--------------------|--------------------|
| Median years post-transplant (IQR)                                          | 3.0 (0.8 – 7.2)    | 3.7 (0.7 – 7.9)    |
| Total number of transplants                                                 |                    |                    |
| 1                                                                           | 13 (92.9)          | 17 (100.0)         |
| 2                                                                           | 1 (7.1)            | 0 (0.0)            |
| Donor source                                                                |                    |                    |
| Living                                                                      | 5 (35.7)           | 12 (70.6)          |
| Deceased                                                                    | 9 (64.3)           | 5 (29.4)           |
| Median total lifetime duration of dialysis in months (IQR)                  | 3.0 (0.0 – 24.0)   | 10.0 (0.3 – 15.0)  |
| Median age at transplant in years (IQR)                                     | 11.7 (5.1 – 16.9)  | 9.9 (7.6 – 14.8)   |
| Primary disease                                                             |                    |                    |
| CAKUT (%)                                                                   | 8 (57.1)           | 5 (29.4)           |
| Glomerulonephritis (%)                                                      | 0 (0.0)            | 0 (0.0)            |
| FSGS (%)                                                                    | 0 (0.0)            | 6 (35.3)           |
| Other (%)                                                                   | 6 (42.9)           | 6 (35.3)           |
| Number of past acute rejections                                             |                    |                    |
| 0 (%)                                                                       | 14 (100.0)         | 17 (100.0)         |
| 1 (%)                                                                       | 0 (0.0)            | 0 (0.0)            |
| Comorbidities                                                               |                    |                    |
| None                                                                        | 5 (35.7)           | 7 (41.2)           |
| ≥1*                                                                         | 9 (64.3)           | 10 (58.8)          |
| Median eGFR at baseline (ml/min/1.73m <sup>2</sup> ; IQR)                   | 66.3 (53.3 – 86.6) | 53.7 (42.5 – 58.1) |
| <b>Treatment characteristics:</b>                                           |                    |                    |
| Number of immunosuppressive medications                                     |                    |                    |
| 1                                                                           | 0 (0.0)            | 0 (0.0)            |
| 2                                                                           | 10 (71.4)          | 9 (52.9)           |
| 3                                                                           | 4 (28.6)           | 8 (47.1)           |
| Number of doses of immunosuppressives per day                               |                    |                    |
| 1                                                                           | 0 (0.0)            | 2 (11.8)           |
| 2                                                                           | 14 (100.0)         | 15 (88.2)          |
| Median total number of medications (IQR)                                    | 6.0 (5.0 – 8.0)    | 7.0 (5.0 – 7.0)    |
| Total number of doses per day                                               |                    |                    |
| 1                                                                           | 0 (0.0)            | 0 (0.0)            |
| 2                                                                           | 14 (100.0)         | 16 (94.1)          |
| 3                                                                           | 0 (0.0)            | 0 (0.0)            |
| 4                                                                           | 0 (0.0)            | 1 (5.9)            |
| <b>Pre-intervention adherence and barriers</b>                              |                    |                    |
| Run-in electronic adherence data                                            |                    |                    |
| Median taking adherence (% all prescribed doses taken) (IQR) †              | n/a                | n/a                |
| Median timing adherence (% all prescribed doses taken on time) (IQR) †      | n/a                | n/a                |
| Standard deviation of tacrolimus levels in the 6 months before intervention |                    |                    |
| Once per day formulation (mean ± SD)*                                       | n/a                | n/a                |
| Twice per day formulation (mean ± SD)**                                     | 1.5 ± 0.8          | 2.8 ± 2.1          |
| Self-reported adherence (MAM; enrollment)                                   |                    |                    |
| Taking adherence (mean ± SD)                                                | 98.0 ± 4.4         | 97.9 ± 4.9         |
| Timing adherence (mean ± SD)                                                | 91.3 ± 11.9        | 91.6 ± 11.9        |

|                                                                 |                    |                    |
|-----------------------------------------------------------------|--------------------|--------------------|
| Adherence barriers (AMBS) scores<br>Total score (mean ± SD)     | 36.0 ± 9.2         | 40.8 ± 7.2         |
| Adherence barriers (PMBS) scores<br>Total score (mean ± SD)     | 36.5 ± 7.9         | 38.0 ± 6.9         |
| <b>Time in study and coach contact time</b>                     |                    |                    |
| <b>Run-in interval</b>                                          |                    |                    |
| Median patient-months (IQR)                                     | 3.1 (3.0 – 3.2)    | 3.3 (2.8 – 5.4)    |
| Median time spent with coach (minutes; IQR)<br>Enrollment visit | 45.0 (40.0 – 60.0) | 40.0 (35.0 – 57.0) |
| <b>Intervention interval</b>                                    |                    |                    |
| Median patient-months (IQR)                                     | 12.2 (10.7 – 12.9) | 10.1 (4.6 – 12.7)  |
| Median time spent with coach (minutes; IQR)                     |                    |                    |
| 1 <sup>st</sup> Intervention visit (3 mo.)                      | 25.0 (20.0 – 35.0) | 67.5 (55.0 – 80.0) |
| 6-month visit                                                   | 24.0 (20.0 – 29.5) | 34.5 (23.5 – 45.0) |
| 9-month visit                                                   | 20.0 (16.0 – 33.0) | 30.0 (26.0 – 32.0) |
| 12-month visit                                                  | 22.5 (20.0 – 28.5) | 32.0 (30.0 – 33.0) |
| 15-month visit                                                  | 29.0 (25.0 – 35.0) | 33.5 (20.0 – 37.5) |

\*There was only 1 patient (intervention) taking once per day tacrolimus.

\*\*7 control and 3 intervention patients with ≥3 trough levels available to calculate SD

†There were insufficient pillbox data available on these participants to calculate taking and timing adherence during the run-in.
