# Supplementary material
Source: PubMed Central journal article supplement (PMC6019162)
Supplement: NIHMS949250-supplement-4.pdf [file NIHMS949250-supplement-4.pdf]

**Table S3: Participant characteristic details**

|                                                                    | <b>Control<br/>(n = 88)</b> | <b>Intervention<br/>(n = 81)</b> |
|--------------------------------------------------------------------|-----------------------------|----------------------------------|
| <b>Demographics</b>                                                |                             |                                  |
| Study site (%)                                                     |                             |                                  |
| Philadelphia (%)                                                   | 16 (18.2)                   | 15 (18.5)                        |
| Cincinnati (%)                                                     | 12 (13.6)                   | 14 (17.3)                        |
| Seattle (%)                                                        | 16 (18.2)                   | 13 (16.1)                        |
| St. Louis (%)                                                      | 12 (13.6)                   | 12 (14.8)                        |
| Montreal- McGill (%)                                               | 8 (9.1)                     | 8 (9.9)                          |
| Montreal- Ste. Justine (%)                                         | 5 (5.7)                     | 3 (3.7)                          |
| Toronto (%)                                                        | 11 (12.5)                   | 9 (11.1)                         |
| Vancouver (%)                                                      | 8 (9.1)                     | 7 (8.6)                          |
| Primary caregiver                                                  |                             |                                  |
| Mother                                                             | 71 (80.7)                   | 66 (81.5)                        |
| Father                                                             | 11 (12.5)                   | 9 (11.1)                         |
| Grandparent                                                        | 2 (2.3)                     | 1 (1.2)                          |
| Self                                                               | 4 (4.6)                     | 5 (6.2)                          |
| Education of primary caregiver                                     |                             |                                  |
| Less than high school                                              | 5 (5.7)                     | 9 (11.1)                         |
| High school                                                        | 19 (21.6)                   | 24 (29.6)                        |
| Some college                                                       | 18 (20.5)                   | 15 (18.5)                        |
| Completed Business/Trade/Technical School                          | 5 (5.7)                     | 2 (2.5)                          |
| College graduate                                                   | 31 (35.2)                   | 25 (30.9)                        |
| Completed Graduate School                                          | 10 (11.4)                   | 6 (7.4)                          |
| Adults in household (number, not including pt)                     |                             |                                  |
| 0                                                                  | 3 (3.4)                     | 2 (2.5)                          |
| 1                                                                  | 17 (19.3)                   | 15 (18.5)                        |
| 2                                                                  | 46 (52.3)                   | 44 (54.3)                        |
| ≥3                                                                 | 22 (25.0)                   | 20 (24.7)                        |
| <b>Treatment characteristics:</b>                                  |                             |                                  |
| Immunosuppressive medications                                      |                             |                                  |
| Number taking twice per day tacrolimus (%)                         | 62 (70.5)                   | 61 (75.3)                        |
| Number taking once per day tacrolimus (%)                          | 9 (10.2)                    | 6 (7.4)                          |
| Number taking mycophenolate (%)                                    | 68 (77.3)                   | 68 (84.0)                        |
| Number taking prednisone (%)                                       | 50 (56.8)                   | 59 (72.8)                        |
| Number taking sirolimus (%)                                        | 16 (18.2)                   | 17 (21.0)                        |
| Number taking cyclosporine (%)                                     | 2 (2.3)                     | 2 (2.5)                          |
| Number taking azathioprine (%)                                     | 7 (8.0)                     | 4 (4.9)                          |
| Number taking other (%)                                            | 6 (6.7)                     | 1 (1.2)                          |
| Total number of doses per day (all meds)                           |                             |                                  |
| 1                                                                  | 3 (3.4)                     | 1 (1.2)                          |
| 2                                                                  | 74 (84.1)                   | 76 (93.8)                        |
| 3                                                                  | 8 (9.1)                     | 3 (3.7)                          |
| 4                                                                  | 3 (3.4)                     | 1 (1.2)                          |
| Median proportion of visits at which a caregiver was present (IQR) | 100 (68-100)                | 100 (60-100)                     |
