# Supplementary material
Source: PubMed Central journal article supplement (PMC6019162)
Supplement: NIHMS949250-supplement-5.pdf [file NIHMS949250-supplement-5.pdf]

**Table S4: Proportion of days during the intervention interval with 0%, 50%, and 100% taking and timing adherence**

|                         | <b>Control</b> | <b>Intervention</b> |
|-------------------------|----------------|---------------------|
| <b>Taking adherence</b> |                |                     |
| 0%                      | 12.1%          | 7.3%                |
| 50%                     | 19.9%          | 14.8%               |
| 100%                    | 68.0%          | 77.9%               |
| <b>Timing adherence</b> |                |                     |
| 0%                      | 16.5%          | 9.3%                |
| 50%                     | 22.7%          | 18.1%               |
| 100%                    | 60.8%          | 72.6%               |
